# Supplementary material for: Google Trends on Obesity, Smoking and Alcoholism: Global and Country-Specific Interest
Source: PubMed Central journal article supplement (PMC7916197; doi:10.3390/healthcare9020190), 2021-02-09

**Figure S1.** Correlation plots of searches performed in Australia and Mexico. \*\*\*p<0.001

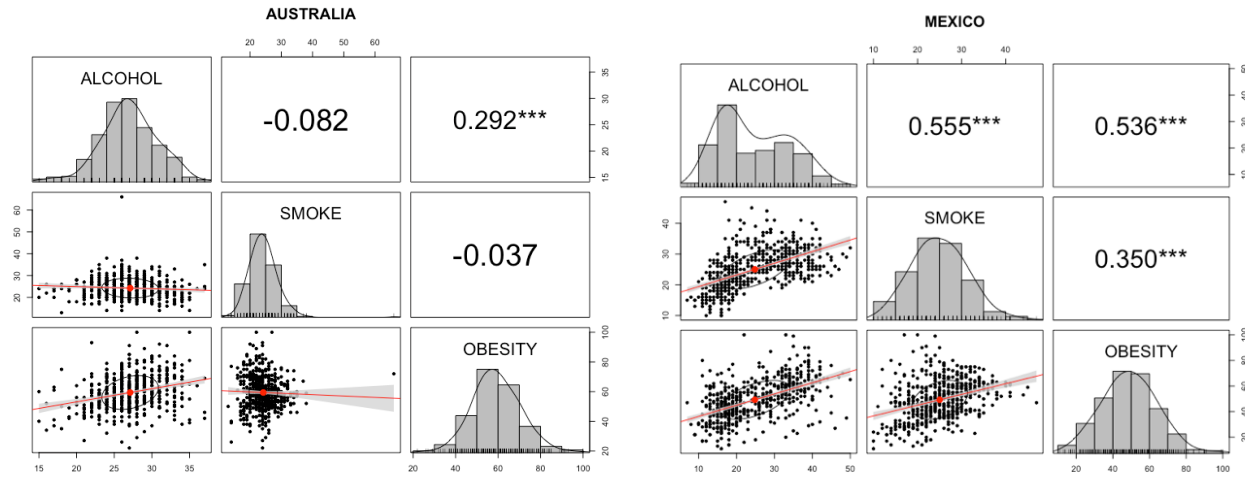

Supplement: healthcare-09-00190-s001.pdf [file healthcare-09-00190-s001.pdf]
